# Supplementary material for: Non-covalent stacking interactions directing the structural and photophysical features of mono- and dinuclear cyclometalated palladium(ii) complexes
Source: Royal Society of Chemistry journal article supplement (doi:10.1039/c5dt04913j), 2016-01-01
Supplement: c5dt04913j1.pdf [file c5dt04913j1.pdf]

## Non-covalent stacking interactions directing the structural and photophysical features of mono- and dinuclear cyclometallated palladium(II) complexes

M. D. Santana,<sup>\*a</sup> L. López-Banet,<sup>a</sup> G. Sánchez,<sup>a</sup> J. Pérez,<sup>b</sup> E. Pérez,<sup>b</sup> L. García,<sup>b</sup> J. L. Serrano<sup>b</sup> and A. Espinosa.<sup>c</sup>

<sup>a</sup> Departamento Química Inorgánica, Universidad de Murcia, 30071 Murcia, Spain. E-mail: dsl@um.es

<sup>b</sup> Departamento Ingeniería Minera, Geológica y Cartográfica (Área de Química Inorgánica), Universidad Politécnica de Cartagena, 30203 Cartagena (Murcia), Spain.

<sup>c</sup> Departamento de Química Orgánica, Universidad de Murcia, Campus de Espinardo, E-30071 Murcia, Spain.

### Electronic Supplementary Information

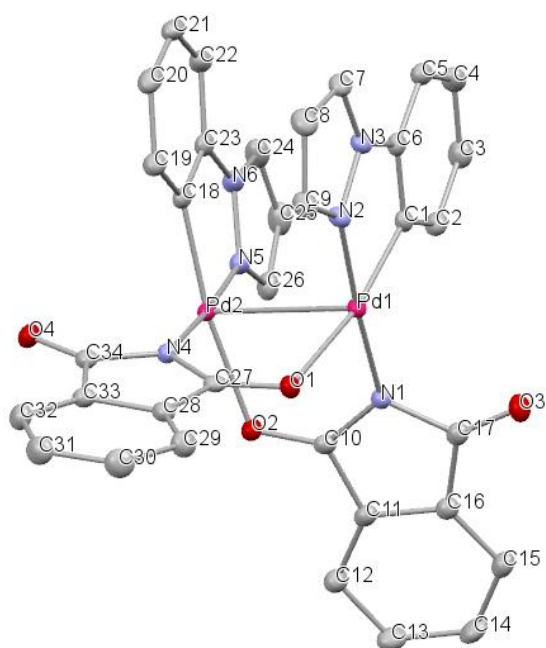

Figure S1. ORTEP plot of complex **13**

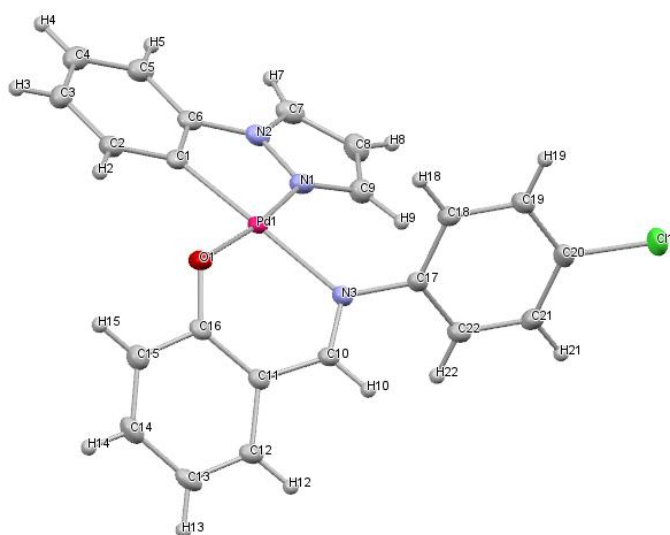

Figure S2. ORTEP plot of complex 15

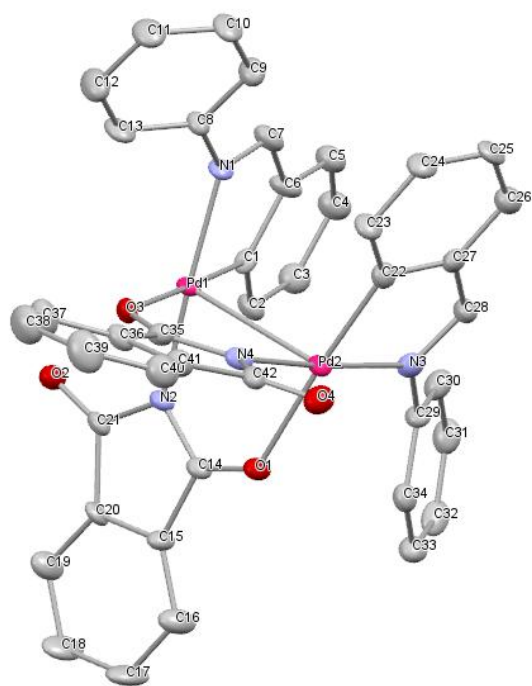

Figure S3. ORTEP plot of complex 113

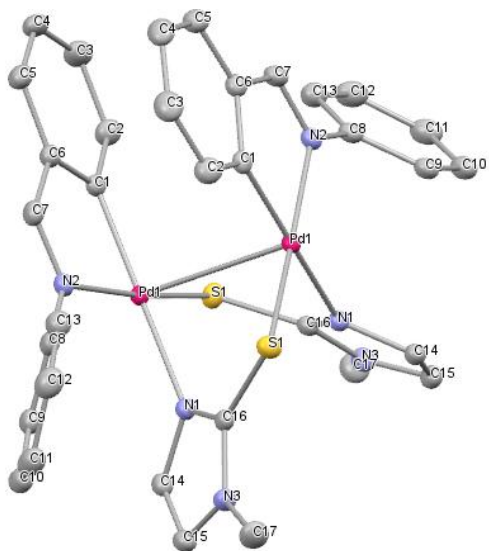

Figure S4. ORTEP plot of complex II4

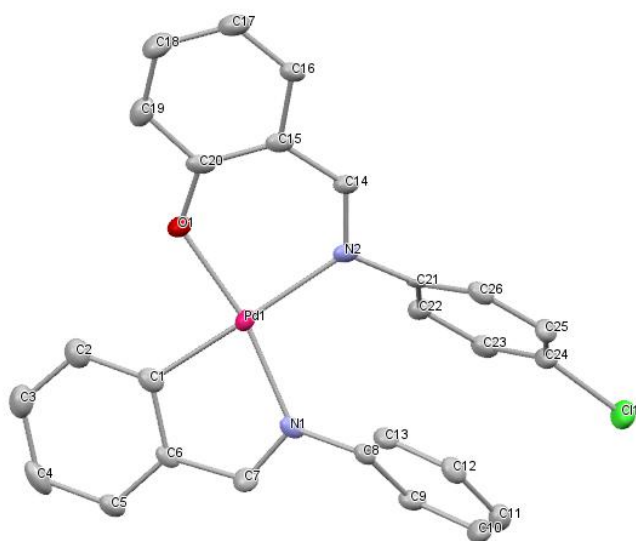

Figure S5. ORTEP plot of complex II5

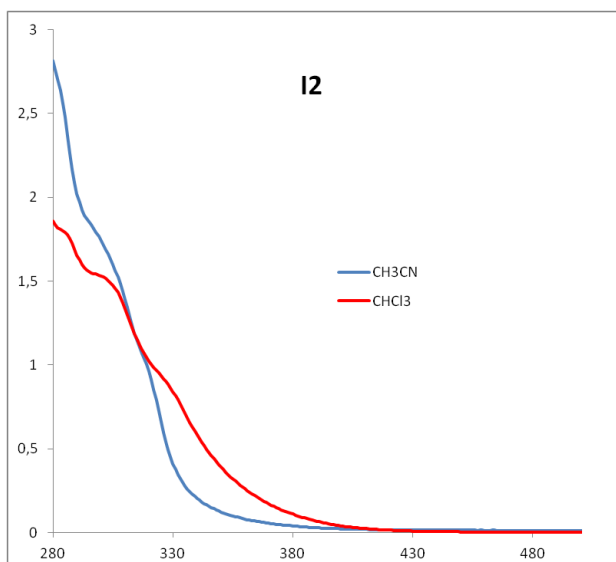

Figure S6. Absorption spectra of complex **12** in chloroform and acetonitrile solutions.

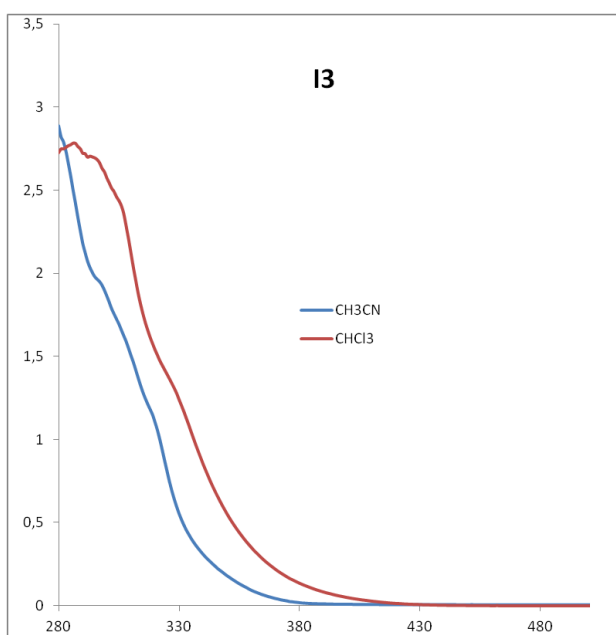

Figure S7. Absorption spectra of complex **13** in chloroform and acetonitrile solutions.

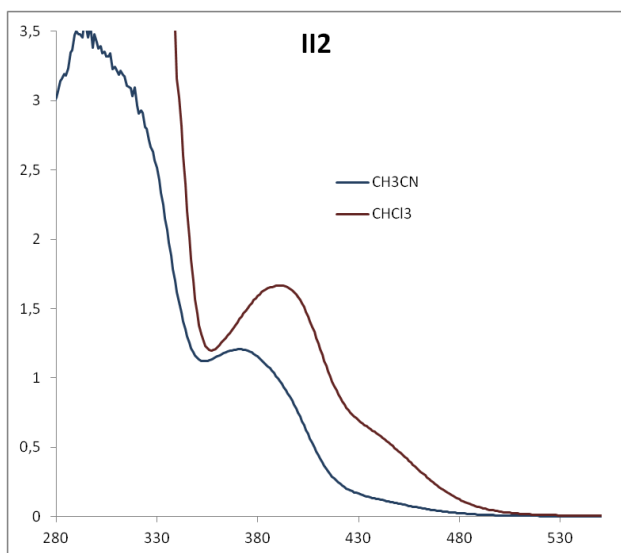

Figure S8. Absorption spectra of complex **II2** in chloroform and acetonitrile solutions.

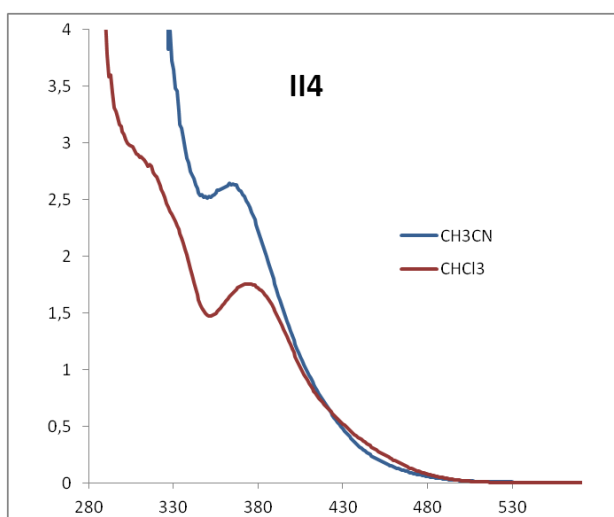

Figure S9. Absorption spectra of complex **II4** in chloroform and acetonitrile solutions.

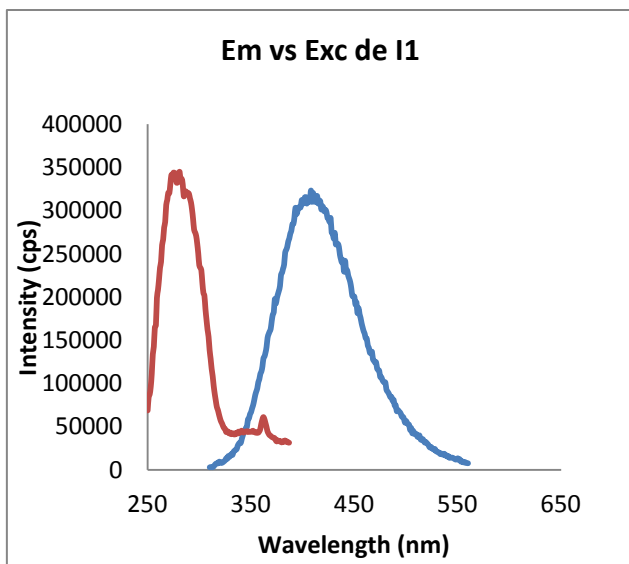

Figure S10. Emission (blue line) and excitation (red line) spectra of complex **I1** in chloroform solution.

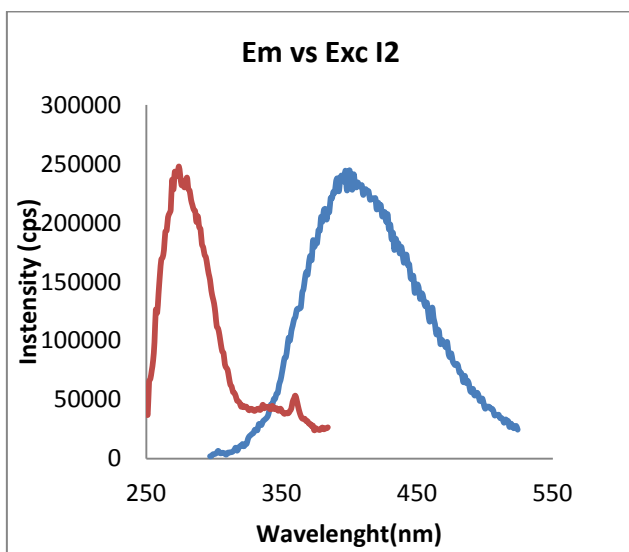

Figure S11. Emission (blue line) and excitation (red line) spectra of complex **I2** in chloroform solution.

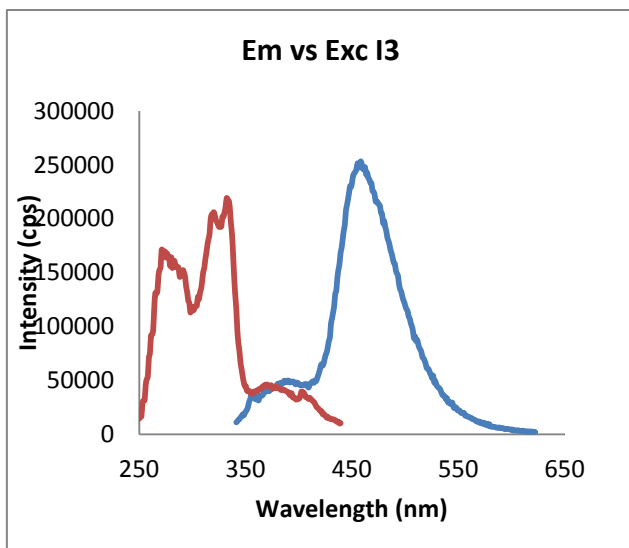

Figure S12. Emission (blue line) and excitation (red line) spectra of complex **13** in chloroform solution.

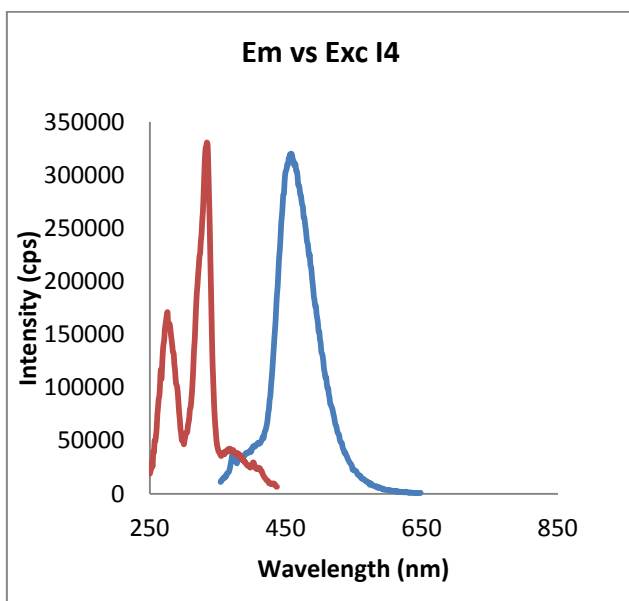

Figure S13. Emission (blue line) and excitation (red line) spectra of complex **14** in chloroform solution.

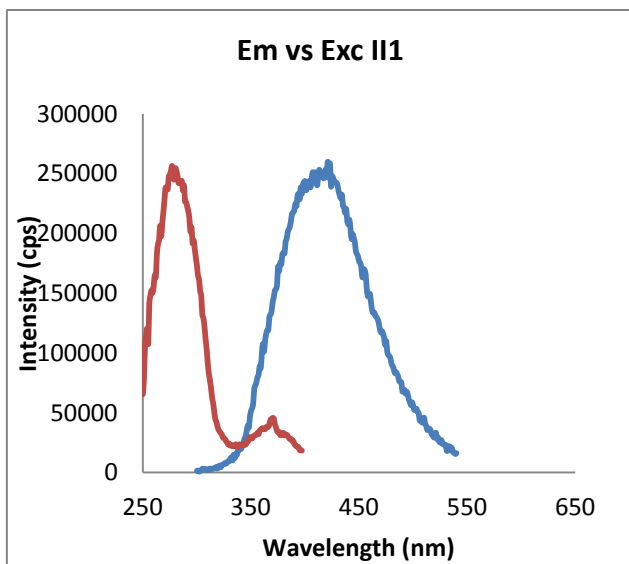

Figure S14. Emission (blue line) and excitation (red line) spectra of complex **II1** in chloroform solution.

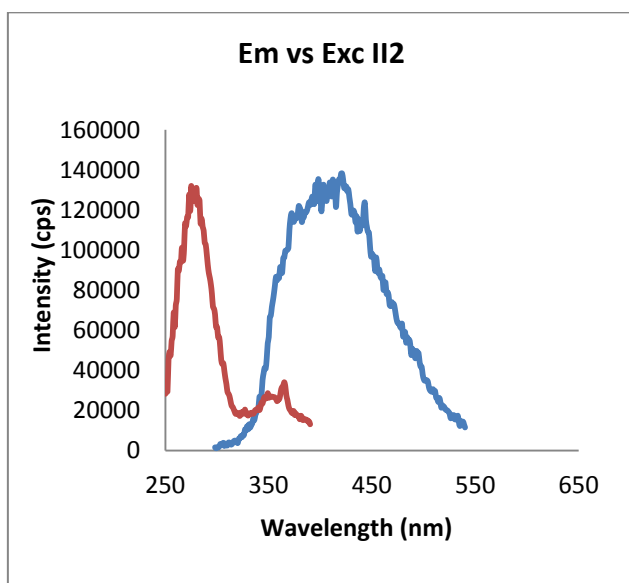

Figure S15. Emission (blue line) and excitation (red line) spectra of complex **II2** in chloroform solution.



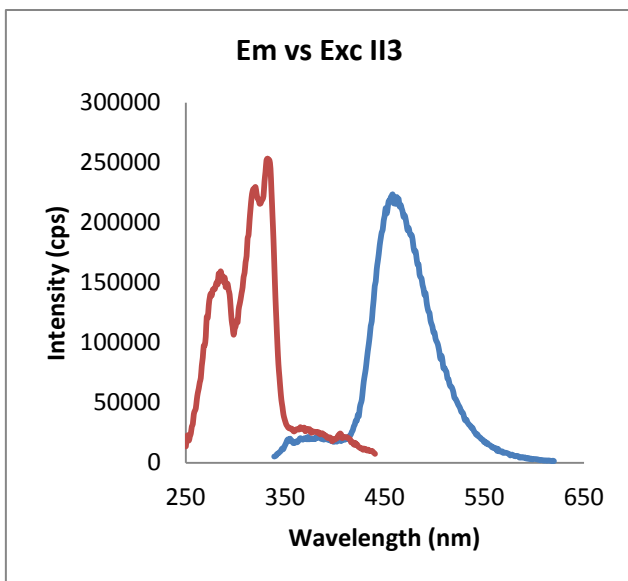

Figure S16. Emission (blue line) and excitation (red line) spectra of complex **II3** in chloroform solution.

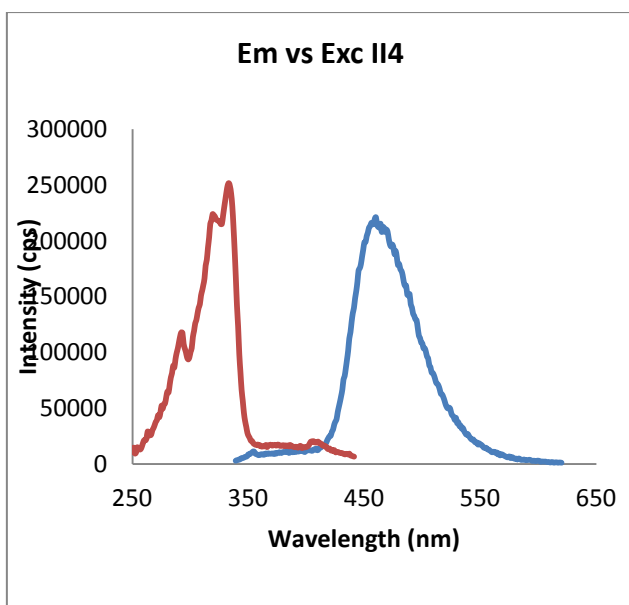

Figure S17. Emission (blue line) and excitation (red line) spectra of complex **II4** in chloroform solution.

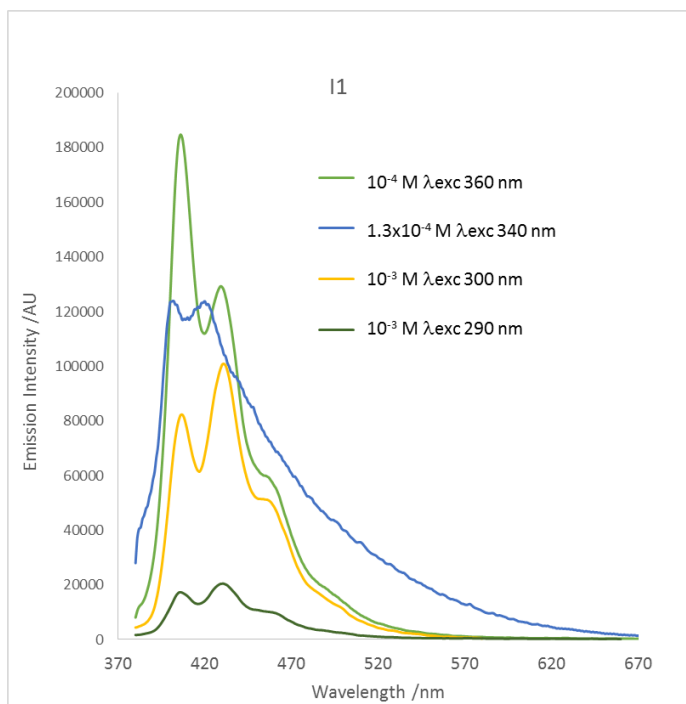

Figure S18. Emission spectrum of complex **I1** at different concentrations in chloroform solutions.

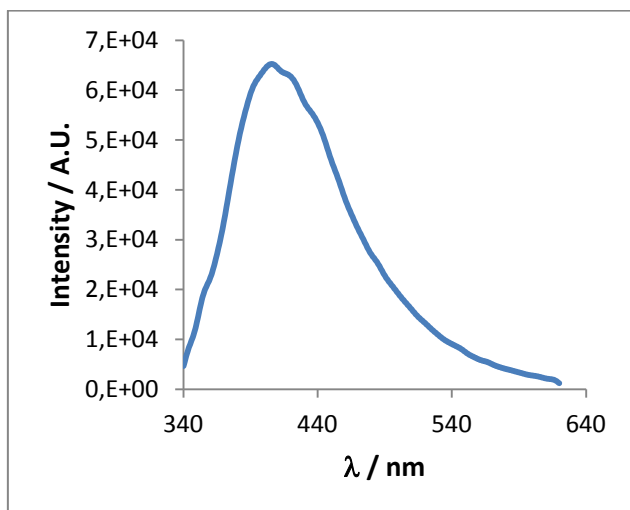

Figure S19. Emission spectrum of complex **I2** in chloroform solution at  $1.7 \times 10^{-4}$  M  $\lambda_{exc}$  320 nm.

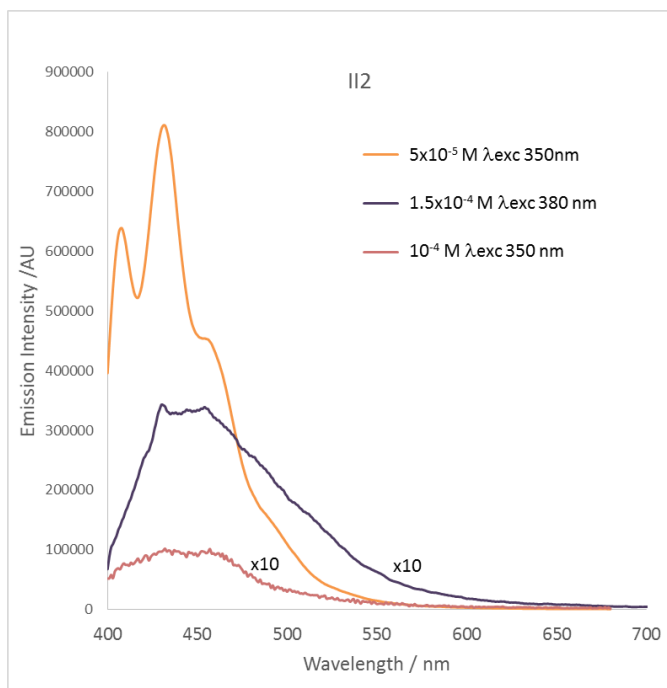

Figure S20. Emission spectrum of complex **II2** at different concentrations in chloroform solutions.

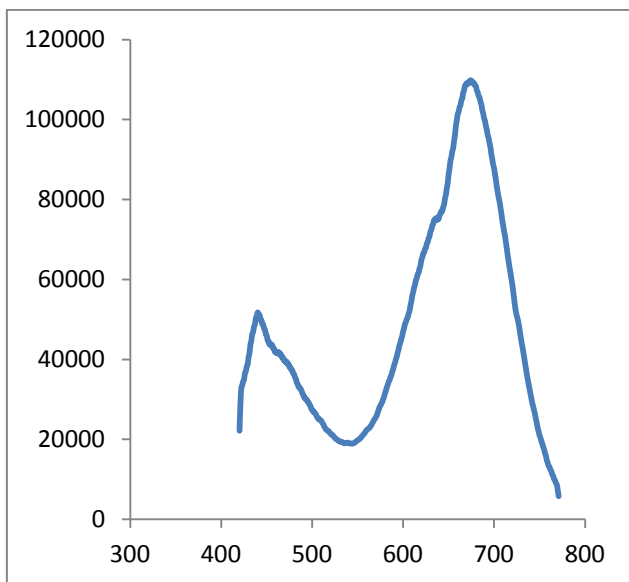

Figure S21. Emission spectra of complex **I2** in solid state

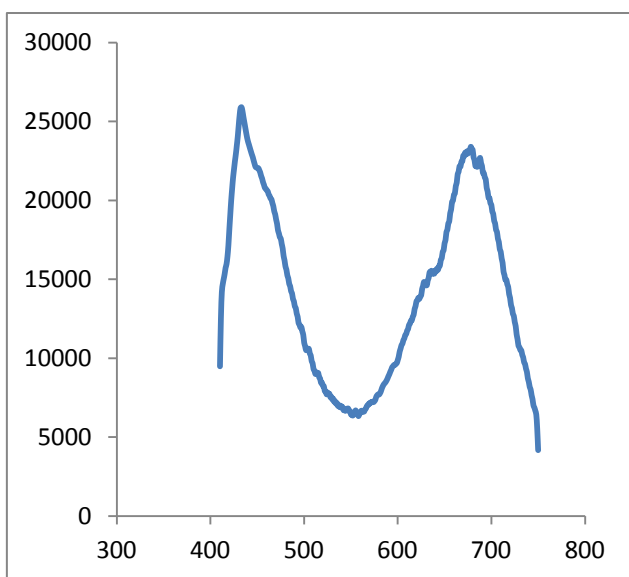

Figure S22. Emission spectra of complex **13** in solid state

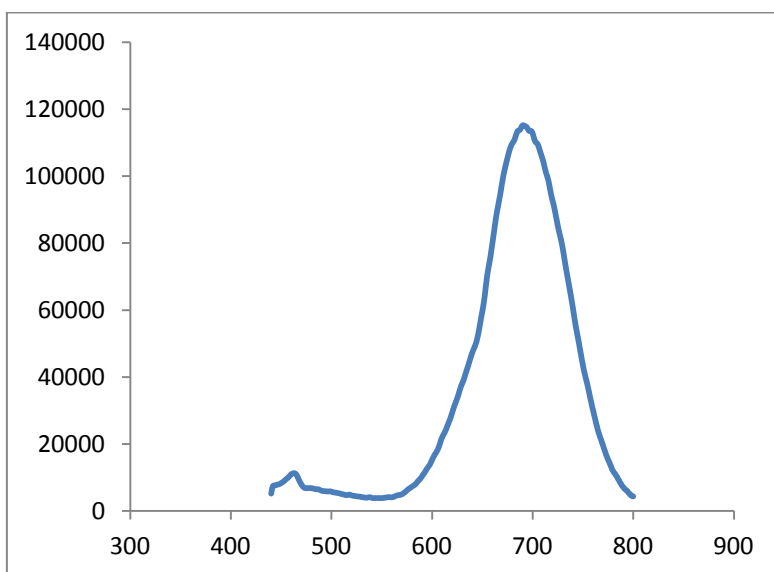

Figure S23. Emission spectra of complex **11** in solid state

Table S1

| Calculated density |          |           |
|--------------------|----------|-----------|
|                    | Series I | Series II |
| Ligand 1           | 1.854    | 1.704     |
| Ligand 4           | 1.835    | 1.728     |
| Ligand 5           | 1.704    | 1.613     |

---

Table S2. Crystal data and structure refinement for **I3**


---

|                                   |                                                                               |                  |
|-----------------------------------|-------------------------------------------------------------------------------|------------------|
| Identification code               | I3                                                                            |                  |
| Empirical formula                 | C <sub>38</sub> H <sub>32</sub> N <sub>6</sub> O <sub>5</sub> Pd <sub>2</sub> |                  |
| Formula weight                    | 865.50                                                                        |                  |
| Temperature                       | 293(2) K                                                                      |                  |
| Wavelength                        | 0.71073 Å                                                                     |                  |
| Crystal system                    | triclinic                                                                     |                  |
| Space group                       | P-1                                                                           |                  |
| Unit cell dimensions              | a = 8.7725(6) Å                                                               | α = 70.7900(10)° |
|                                   | b = 12.4247(9) Å                                                              | β = 84.1970(10)° |
|                                   | c = 16.5407(12) Å                                                             | γ = 87.9410(10)° |
| Volume                            | 1693.7(2) Å <sup>3</sup>                                                      |                  |
| Z                                 | 2                                                                             |                  |
| Density (calculated)              | 1.697 Mg/m <sup>3</sup>                                                       |                  |
| Absorption coefficient            | 1.117 mm <sup>-1</sup>                                                        |                  |
| F(000)                            | 868                                                                           |                  |
| Crystal size                      | 0.31 x 0.15 x 0.14 mm <sup>3</sup>                                            |                  |
| Theta range for data collection   | 1.31 to 28.59°                                                                |                  |
| Index ranges                      | -11 ≤ h ≤ 11, -16 ≤ k ≤ 16, -22 ≤ l ≤ 22                                      |                  |
| Reflections collected             | 20743                                                                         |                  |
| Independent reflections           | 7942 [R(int) = 0.0162]                                                        |                  |
| Absorption correction             | None                                                                          |                  |
| Refinement method                 | Full-matrix least-squares on F <sup>2</sup>                                   |                  |
| Data / restraints / parameters    | 7942 / 0 / 460                                                                |                  |
| Goodness-of-fit on F <sup>2</sup> | 1.179                                                                         |                  |
| Final R indices [I > 2σ(I)]       | R1 = 0.0222, wR2 = 0.0572                                                     |                  |
| R indices (all data)              | R1 = 0.0238, wR2 = 0.0639                                                     |                  |
| Largest diff. peak and hole       | 0.632 and -0.607 e.Å <sup>-3</sup>                                            |                  |

Table S3. Crystal data and structure refinement for **I5**

|                                   |                                                      |                 |
|-----------------------------------|------------------------------------------------------|-----------------|
| Identification code               | I5                                                   |                 |
| Empirical formula                 | C <sub>22</sub> H <sub>16</sub> ClN <sub>3</sub> OPd |                 |
| Formula weight                    | 480.23                                               |                 |
| Temperature                       | 100(2) K                                             |                 |
| Wavelength                        | 0.71073 Å                                            |                 |
| Crystal system                    | triclinic                                            |                 |
| Space group                       | P-1                                                  |                 |
| Unit cell dimensions              | a = 9.3070(6) Å                                      | α = 93.918(2)°  |
|                                   | b = 10.4711(7) Å                                     | β = 102.381(2)° |
|                                   | c = 10.4887(7) Å                                     | γ = 108.576(2)° |
| Volume                            | 936.02(11) Å <sup>3</sup>                            |                 |
| Z                                 | 2                                                    |                 |
| Density (calculated)              | 1.704 Mg/m <sup>3</sup>                              |                 |
| Absorption coefficient            | 1.152 mm <sup>-1</sup>                               |                 |
| F(000)                            | 480                                                  |                 |
| Crystal size                      | 0.17 x 0.09 x 0.05 mm <sup>3</sup>                   |                 |
| Theta range for data collection   | 2.01 to 29.45°                                       |                 |
| Index ranges                      | -12 ≤ h ≤ 12, -14 ≤ k ≤ 14, -14 ≤ l ≤ 14             |                 |
| Reflections collected             | 29136                                                |                 |
| Independent reflections           | 5189 [R(int) = 0.0393]                               |                 |
| Absorption correction             | None                                                 |                 |
| Max. and min. transmission        | 0.9446 and 0.8282                                    |                 |
| Refinement method                 | Full-matrix least-squares on F <sup>2</sup>          |                 |
| Data / restraints / parameters    | 5189 / 0 / 253                                       |                 |
| Goodness-of-fit on F <sup>2</sup> | 1.048                                                |                 |
| Final R indices [I > 2σ(I)]       | R1 = 0.0313, wR2 = 0.0767                            |                 |
| R indices (all data)              | R1 = 0.0383, wR2 = 0.0799                            |                 |
| Largest diff. peak and hole       | 1.194 and -1.266 e.Å <sup>-3</sup>                   |                 |

---

Table S4. Crystal data and structure refinement for **II3**


---

|                                   |                                             |                           |
|-----------------------------------|---------------------------------------------|---------------------------|
| Identification code               | II3                                         |                           |
| Empirical formula                 | $C_{43}H_{30}Cl_2N_4O_4Pd_2$                |                           |
| Formula weight                    | 950.41                                      |                           |
| Temperature                       | 100(2) K                                    |                           |
| Wavelength                        | 0.71073 Å                                   |                           |
| Crystal system                    | monoclinic                                  |                           |
| Space group                       | P21/c                                       |                           |
| Unit cell dimensions              | a = 9.7804(10) Å                            | $\alpha = 90^\circ$       |
|                                   | b = 17.4573(18) Å                           | $\beta = 97.068(3)^\circ$ |
|                                   | c = 22.148(2) Å                             | $\gamma = 90^\circ$       |
| Volume                            | 3752.7(7) Å <sup>3</sup>                    |                           |
| Z                                 | 4                                           |                           |
| Density (calculated)              | 1.682 Mg/m <sup>3</sup>                     |                           |
| Absorption coefficient            | 1.151 mm <sup>-1</sup>                      |                           |
| F(000)                            | 1896                                        |                           |
| Crystal size                      | 0.18 x 0.03 x 0.03 mm <sup>3</sup>          |                           |
| Theta range for data collection   | 2.10 to 29.95°                              |                           |
| Index ranges                      | -13 ≤ h ≤ 12, -24 ≤ k ≤ 24, -29 ≤ l ≤ 31    |                           |
| Reflections collected             | 54211                                       |                           |
| Independent reflections           | 10701 [R(int) = 0.1224]                     |                           |
| Absorption correction             | None                                        |                           |
| Max. and min. transmission        | 0.9663 and 0.8196                           |                           |
| Refinement method                 | Full-matrix least-squares on F <sup>2</sup> |                           |
| Data / restraints / parameters    | 10701 / 0 / 481                             |                           |
| Goodness-of-fit on F <sup>2</sup> | 1.033                                       |                           |
| Final R indices [I > 2σ(I)]       | R1 = 0.0763, wR2 = 0.1244                   |                           |
| R indices (all data)              | R1 = 0.1786, wR2 = 0.1602                   |                           |
| Largest diff. peak and hole       | 1.761 and -2.490 e.Å <sup>-3</sup>          |                           |

---

---

Table S5. Crystal data and structure refinement for **II4**


---

|                                   |                                                                               |             |
|-----------------------------------|-------------------------------------------------------------------------------|-------------|
| Identification code               | II4                                                                           |             |
| Empirical formula                 | C <sub>34</sub> H <sub>30</sub> N <sub>6</sub> Pd <sub>2</sub> S <sub>2</sub> |             |
| Formula weight                    | 799.56                                                                        |             |
| Temperature                       | 100(2) K                                                                      |             |
| Wavelength                        | 0.71073 Å                                                                     |             |
| Crystal system                    | monoclinic                                                                    |             |
| Space group                       | C2/c                                                                          |             |
| Unit cell dimensions              | a = 23.5263(19) Å                                                             | α = 90°     |
|                                   | b = 10.5734(8) Å                                                              | β = 116.96° |
|                                   | c = 13.8590(11) Å                                                             | γ = 90°     |
| Volume                            | 3072.9(4) Å <sup>3</sup>                                                      |             |
| Z                                 | 4                                                                             |             |
| Density (calculated)              | 1.728 Mg/m <sup>3</sup>                                                       |             |
| Absorption coefficient            | 1.342 mm <sup>-1</sup>                                                        |             |
| F(000)                            | 1600                                                                          |             |
| Crystal size                      | 0.31 x 0.18 x 0.10 mm <sup>3</sup>                                            |             |
| Theta range for data collection   | 1.94 to 28.65°                                                                |             |
| Index ranges                      | -31 ≤ h ≤ 31, -13 ≤ k ≤ 14, -18 ≤ l ≤ 18                                      |             |
| Reflections collected             | 18269                                                                         |             |
| Independent reflections           | 3749 [R(int) = 0.0178]                                                        |             |
| Absorption correction             | None                                                                          |             |
| Max. and min. transmission        | 0.8775 and 0.6810                                                             |             |
| Refinement method                 | Full-matrix least-squares on F <sup>2</sup>                                   |             |
| Data / restraints / parameters    | 3749 / 0 / 211                                                                |             |
| Goodness-of-fit on F <sup>2</sup> | 1.100                                                                         |             |
| Final R indices [I > 2σ(I)]       | R1 = 0.0201, wR2 = 0.0506                                                     |             |
| R indices (all data)              | R1 = 0.0208, wR2 = 0.0511                                                     |             |
| Largest diff. peak and hole       | 0.378 and -0.578 e.Å <sup>-3</sup>                                            |             |



Table S6. Crystal data and structure refinement for **II5**

|                                   |                                                                                                 |
|-----------------------------------|-------------------------------------------------------------------------------------------------|
| Identification code               | II5                                                                                             |
| Empirical formula                 | C <sub>26</sub> H <sub>19</sub> ClN <sub>2</sub> OPd                                            |
| Formula weight                    | 517.28                                                                                          |
| Temperature                       | 100(2) K                                                                                        |
| Wavelength                        | 0.71073 Å                                                                                       |
| Crystal system                    | orthorhombic                                                                                    |
| Space group                       | P212121                                                                                         |
| Unit cell dimensions              | a = 9.3779(8) Å      α = 90°<br>b = 10.1838(9) Å      β = 90°<br>c = 22.3045(18) Å      γ = 90° |
| Volume                            | 2130.1(3) Å <sup>3</sup>                                                                        |
| Z                                 | 4                                                                                               |
| Density (calculated)              | 1.613 Mg/m <sup>3</sup>                                                                         |
| Absorption coefficient            | 1.018 mm <sup>-1</sup>                                                                          |
| F(000)                            | 1040                                                                                            |
| Crystal size                      | 0.26 x 0.11 x 0.05 mm <sup>3</sup>                                                              |
| Theta range for data collection   | 2.20 to 31.07°                                                                                  |
| Index ranges                      | -13 ≤ h ≤ 13, -14 ≤ k ≤ 14, -31 ≤ l ≤ 29                                                        |
| Reflections collected             | 31348                                                                                           |
| Independent reflections           | 6520 [R(int) = 0.1003]                                                                          |
| Absorption correction             | None                                                                                            |
| Max. and min. transmission        | 0.9509 and 0.7778                                                                               |
| Refinement method                 | Full-matrix least-squares on F <sup>2</sup>                                                     |
| Data / restraints / parameters    | 6520 / 0 / 280                                                                                  |
| Goodness-of-fit on F <sup>2</sup> | 1.003                                                                                           |
| Final R indices [I > 2σ(I)]       | R1 = 0.0475, wR2 = 0.0949                                                                       |
| R indices (all data)              | R1 = 0.0726, wR2 = 0.1002                                                                       |
| Absolute structure parameter      | 0.97(3)                                                                                         |
| Largest diff. peak and hole       | 2.770 and -1.646 e.Å <sup>-3</sup>                                                              |
